# Supplementary material
Source: PubMed Central journal article supplement (PMC9616308)
Supplement: mmc1.pdf [file mmc1.pdf]

## Cytokine and Reward Circuitry Relationships in Treatment-Resistant Depression

### *Supplement*

**Table S1. Correlation matrix of demographic measures, clinical measures, and cytokine levels.**

Participant variables are listed in columns and rows, with correlations between variables in cells. Highlighted measures indicate significant associations at  $p < 0.05$ . Note that: \* indicates  $p < 0.05$ ; \*\* indicates  $p < 0.01$ ; \*\*\* indicates  $p < 0.001$ . IL-6 and TNF $\alpha$  are described in pg/mL (log-transformed), age in years, and BMI in kg/m<sup>2</sup>. Abbreviations: CTQ, Childhood Trauma Questionnaire; EA, Emotional Abuse; EN, Emotional Neglect; PA, Physical Abuse; PN, Physical Neglect; SA, Sexual Abuse; MADRS, Montgomery-Asberg Depression Rating Scale.

|              | TNF $\alpha$ | Age    | BMI      | MADRS  | CTQ    | CTQ PA   | CTQ SA   | CTQ EA   | CTQ EN   | CTQ PN   |
|--------------|--------------|--------|----------|--------|--------|----------|----------|----------|----------|----------|
| IL-6         | 0.328**      | 0.12   | 0.445*** | 0.128  | 0.027  | -0.026   | 0.073    | 0.038    | 0.027    | -0.04    |
| TNF $\alpha$ |              | -0.033 | 0.07     | -0.151 | -0.102 | -0.016   | -0.227   | -0.027   | -0.011   | -0.125   |
| Age          |              |        | 0.289*   | -0.084 | -0.119 | 0.009    | -0.148   | -0.075   | -0.138   | -0.07    |
| BMI          |              |        |          | 0.12   | 0.091  | 0.169    | 0.029    | 0.16     | -0.021   | 0.013    |
| MADRS        |              |        |          |        | 0.224  | 0.138    | 0.151    | 0.151    | 0.143    | 0.311**  |
| CTQ          |              |        |          |        |        | 0.745*** | 0.598*** | 0.884*** | 0.841*** | 0.705*** |
| CTQ PA       |              |        |          |        |        |          | 0.364**  | 0.65***  | 0.492*** | 0.409*** |
| CTQ SA       |              |        |          |        |        |          |          | 0.35**   | 0.26*    | 0.291*   |
| CTQ EA       |              |        |          |        |        |          |          |          | 0.755*** | 0.492*** |
| CTQ EN       |              |        |          |        |        |          |          |          |          | 0.601*** |

**Table S1.2. Table of differences based on biological sex of variables.** Independent samples t-tests were performed to assess differences in demographic measures, clinical measures, and cytokine levels based on biological sex group (male or female). IL-6 and TNF $\alpha$  are described in pg/mL (log-transformed), age in years, and BMI in kg/m<sup>2</sup>.

|              | Female | Male  |             |         |
|--------------|--------|-------|-------------|---------|
| n            | 48     | 26    |             |         |
|              | Mean   | Mean  | T-statistic | P value |
| IL-6         | -0.04  | 0.02  | -0.98       | 0.33    |
| TNF $\alpha$ | 0.44   | 0.51  | -1.19       | 0.24    |
| Age          | 36.46  | 35.85 | 0.23        | 0.82    |
| BMI          | 28.79  | 27.19 | 1.07        | 0.29    |
| MADRS        | 33.38  | 32.12 | 0.95        | 0.35    |
| CTQ          | 53.08  | 49.44 | 0.8         | 0.43    |
| CTQ PA       | 7.71   | 8.28  | -0.57       | 0.57    |
| CTQ SA       | 8.23   | 6.56  | 1.45        | 0.15    |
| CTQ EA       | 13.75  | 11.84 | 1.28        | 0.21    |
| CTQ EN       | 14.83  | 14.64 | 0.14        | 0.89    |
| CTQ PN       | 8.56   | 8.12  | 0.52        | 0.6     |

**Table S2. Sensitivity analysis examining medical illness and medications.**

Sensitivity analysis excluding participants (n=18) with history of medical illnesses (e.g., HIV, cancer, eczema) or taking current medications (e.g., loratadine, NSAIDS) potentially affecting immune system function for significant regression models as identified in the main text. Beta values and p values of the Independent Variable (IV) are reported. Interactions effects are denoted by an asterisk between interacting variables. Abbreviations: CTQ, Childhood Trauma Questionnaire; EN, Emotional Neglect.

| Variables               |                         | IV Statistics |                             |         |
|-------------------------|-------------------------|---------------|-----------------------------|---------|
| DV (connectivity score) | IV                      | n             | Unstandardized Beta Weights | P value |
| LVS-LBA11               | IL-6                    | 56            | -0.066                      | 0.014   |
| LVS-RBA11               | IL-6                    | 56            | -0.06                       | 0.005   |
| RVS-RBA11               | TNF $\alpha$ *CTQ Total | 55            | 0.004                       | 0.021   |
| RVS-RBA11               | TNF $\alpha$ *CTQ-EN    | 55            | 0.013                       | 0.024   |
| RVS-RBA10               | IL-6*CTQ-EN             | 55            | 0.018                       | 0.005   |
| RVS-RBA10               | IL-6*CTQ-EN             | 55            | 0.018                       | 0.008   |

**Table S3. Sensitivity analysis of cytokines and covariates.**

Sensitivity analysis of significant primary findings in the main text, reporting beta values and unadjusted p values of IV in regression models with IV and DV and covariate of interest (COI) in regression model with independent variables of the IV (as described below), age, sex, BMI, race (dichotomized), batch, and the COI. Interactions effects are denoted by an asterisk between interacting variables, and these models also included the main effects of the interacting variables. A reference row reflecting unadjusted analyses (e.g., without adjustment for any covariate of interest) is also presented, reflecting the findings as described in the primary manuscript. Alcohol and cigarette use was defined by use of either of these in the past year (dichotomized for presence/absence). Recreational drug use was defined by active recreational drug use (dichotomized for presence/absence). Also, we conducted parallel identical analysis to those in the primary main text examining PROMIS anxiety scores in place of CTQ scores for moderation analyses and found that the interaction of PROMIS anxiety scores and cytokine levels did not predict connectivity scores ( $p$ 's > 0.15), supporting the specificity of the current findings to childhood trauma exposure per se, rather than to internalizing psychopathology more broadly.

## A. Regression models with DV as LVS-LBA11 connectivity score and IV as IL-6

| Covariate of Interest           | n  | IL-6 Statistics             |         |
|---------------------------------|----|-----------------------------|---------|
|                                 |    | Unstandardized Beta Weights | P value |
| Alcohol Use                     | 74 | -0.068                      | 0.004   |
| Cigarette Use                   | 74 | -0.07                       | 0.003   |
| CTQ Total                       | 73 | -0.07                       | 0.002   |
| Current Neuroleptic Use         | 74 | -0.07                       | 0.002   |
| Current SSRI/SNRI Use           | 74 | -0.068                      | 0.003   |
| MADRS                           | 74 | -0.07                       | 0.002   |
| PROMIS Anxiety                  | 74 | -0.068                      | 0.003   |
| Recreational Drug Use           | 74 | -0.069                      | 0.003   |
| Reference (unadjusted analysis) | 74 | -0.069                      | 0.003   |

## B. Regression models with DV as LVS-RBA11 connectivity score and IV as IL-6

| Covariate of Interest           | n  | IL-6 Statistics             |         |
|---------------------------------|----|-----------------------------|---------|
|                                 |    | Unstandardized Beta Weights | P value |
| Alcohol Use                     | 74 | -0.049                      | 0.008   |
| Cigarette Use                   | 74 | -0.046                      | 0.011   |
| CTQ Total                       | 73 | -0.048                      | 0.009   |
| Current Neuroleptic Use         | 74 | -0.049                      | 0.009   |
| Current SSRI/SNRI Use           | 74 | -0.047                      | 0.01    |
| MADRS                           | 74 | -0.049                      | 0.008   |
| PROMIS Anxiety                  | 74 | -0.048                      | 0.008   |
| Recreational Drug Use           | 74 | -0.049                      | 0.007   |
| Reference (unadjusted analysis) | 74 | -0.048                      | 0.009   |

C. Regression models with DV as RVS-RBA11 connectivity and IV as TNF $\alpha$ \*CTQ Total

| Covariate of Interest           | n  | TNF $\alpha$ *CTQ Total Statistics |         |
|---------------------------------|----|------------------------------------|---------|
|                                 |    | Unstandardized Beta Weights        | P value |
| Alcohol Use                     | 73 | 0.004                              | 0.005   |
| Cigarette Use                   | 73 | 0.004                              | 0.004   |
| Current Neuroleptic Use         | 73 | 0.004                              | 0.003   |
| Current SSRI/SNRI Use           | 73 | 0.005                              | 0.001   |
| MADRS                           | 73 | 0.004                              | 0.007   |
| PROMIS Anxiety                  | 73 | 0.004                              | 0.004   |
| Recreational Drug Use           | 73 | 0.004                              | 0.004   |
| Reference (unadjusted analysis) | 73 | 0.004                              | 0.005   |

**Table S4. Moderation effects of childhood trauma**

Table reporting unstandardized beta values and unadjusted p values of IV in regression models examining moderating effects of childhood trauma with IV and DV in regression model with independent variables of the IV (as described below), age, sex, BMI, race (dichotomized), and batch. Interactions effects are denoted by an asterisk between interacting variables, and these models also included the main effects of the interacting variables. Significant associations ( $p < 0.05$ ) are highlighted in yellow, while trend-level associations ( $p < 0.1$ ) are highlighted in grey. N=73.

| DV (connectivity index) | IV Statistics  |         |                         |         |
|-------------------------|----------------|---------|-------------------------|---------|
|                         | IL-6*CTQ Total |         | TNF $\alpha$ *CTQ Total |         |
|                         | Beta           | P value | Beta                    | P value |
| LVS-LBA10               | -0.0002        | 0.933   | 0.0014                  | 0.561   |
| LVS-LBA11               | -0.0011        | 0.33    | -0.0005                 | 0.722   |
| LVS-RBA10               | 0.0004         | 0.83    | 0.0007                  | 0.774   |
| LVS-RBA11               | -0.0008        | 0.348   | 0.0009                  | 0.392   |
| RVS-LBA10               | 0.0034         | 0.062   | 0.0042                  | 0.051   |
| RVS-LBA11               | 0.0009         | 0.477   | 0.0037                  | 0.013   |
| RVS-RBA10               | 0.0024         | 0.136   | 0.0027                  | 0.167   |
| RVS-RBA11               | 0.002          | 0.076   | 0.0038                  | 0.005   |

**Table S5. Exploratory: Moderation effects of childhood trauma subtypes**

Table reporting unstandardized beta values and unadjusted p values of IV (cytokine by CTQ subtype) in regression models examining moderating effects of childhood trauma subtypes with IV and DV in regression model with independent variables of the IV (and main effects of interacting variables), age, sex, BMI, race (dichotomized), and batch. Significant associations prior to multiple comparisons adjustment (unadjusted  $p < 0.05$ ) are highlighted in yellow, while trend-level associations (unadjusted  $p < 0.1$ ) are highlighted in grey.  $N=73$ . Adjusted P values reflect FDR-adjusted p values across the eight connectivity indices as described in the primary manuscript.

| CTQ Subtype           | Connectivity Measure | Cytokine*CTQ Subtype Statistics |         |                  |              |         |                  |
|-----------------------|----------------------|---------------------------------|---------|------------------|--------------|---------|------------------|
|                       |                      | IL-6                            |         |                  | TNF $\alpha$ |         |                  |
|                       |                      | Beta                            | P value | Adjusted P Value | Beta         | P value | Adjusted P Value |
| CTQ Emotional Abuse   | LVS-LBA10            | 0.0024                          | 0.701   | 0.801            | -0.003       | 0.63    | 0.72             |
| CTQ Emotional Abuse   | LVS-LBA11            | -0.002                          | 0.549   | 0.732            | -0.004       | 0.354   | 0.72             |
| CTQ Emotional Abuse   | LVS-RBA10            | -0.0001                         | 0.985   | 0.985            | -0.003       | 0.617   | 0.72             |
| CTQ Emotional Abuse   | LVS-RBA11            | -0.002                          | 0.479   | 0.732            | 0            | 0.962   | 0.962            |
| CTQ Emotional Abuse   | RVS-LBA10            | 0.0112                          | 0.046   | 0.123            | 0.004        | 0.483   | 0.72             |
| CTQ Emotional Abuse   | RVS-LBA11            | 0.0046                          | 0.239   | 0.478            | 0.007        | 0.112   | 0.448            |
| CTQ Emotional Abuse   | RVS-RBA10            | 0.012                           | 0.013   | 0.092            | 0.004        | 0.513   | 0.72             |
| CTQ Emotional Abuse   | RVS-RBA11            | 0.0081                          | 0.023   | 0.092            | 0.008        | 0.039   | 0.308            |
| CTQ Physical Abuse    | LVS-LBA10            | -0.0032                         | 0.801   | 0.801            | -0.004       | 0.72    | 0.881            |
| CTQ Physical Abuse    | LVS-LBA11            | -0.0061                         | 0.38    | 0.76             | -0.006       | 0.341   | 0.683            |
| CTQ Physical Abuse    | LVS-RBA10            | 0.0047                          | 0.708   | 0.801            | 0.001        | 0.923   | 0.923            |
| CTQ Physical Abuse    | LVS-RBA11            | -0.005                          | 0.375   | 0.76             | 0.002        | 0.642   | 0.881            |
| CTQ Physical Abuse    | RVS-LBA10            | 0.0114                          | 0.326   | 0.76             | 0.012        | 0.233   | 0.622            |
| CTQ Physical Abuse    | RVS-LBA11            | 0.002                           | 0.799   | 0.801            | 0.012        | 0.08    | 0.622            |
| CTQ Physical Abuse    | RVS-RBA10            | 0.0159                          | 0.116   | 0.76             | 0.003        | 0.771   | 0.881            |
| CTQ Physical Abuse    | RVS-RBA11            | 0.0024                          | 0.748   | 0.801            | 0.008        | 0.215   | 0.622            |
| CTQ Sexual Abuse      | LVS-LBA10            | -0.0089                         | 0.095   | 0.43             | 0.01         | 0.29    | 0.463            |
| CTQ Sexual Abuse      | LVS-LBA11            | -0.0046                         | 0.11    | 0.43             | 0.003        | 0.51    | 0.582            |
| CTQ Sexual Abuse      | LVS-RBA10            | -0.0043                         | 0.408   | 0.653            | 0.002        | 0.809   | 0.809            |
| CTQ Sexual Abuse      | LVS-RBA11            | -0.0032                         | 0.161   | 0.43             | 0.007        | 0.102   | 0.235            |
| CTQ Sexual Abuse      | RVS-LBA10            | -0.0023                         | 0.638   | 0.804            | 0.013        | 0.118   | 0.235            |
| CTQ Sexual Abuse      | RVS-LBA11            | -0.0013                         | 0.703   | 0.804            | 0.014        | 0.009   | 0.05             |
| CTQ Sexual Abuse      | RVS-RBA10            | -0.0043                         | 0.323   | 0.645            | 0.005        | 0.467   | 0.582            |
| CTQ Sexual Abuse      | RVS-RBA11            | 0.0001                          | 0.976   | 0.976            | 0.013        | 0.013   | 0.05             |
| CTQ Emotional Neglect | LVS-LBA10            | 0.0083                          | 0.253   | 0.337            | 0.002        | 0.842   | 0.842            |
| CTQ Emotional Neglect | LVS-LBA11            | -0.0002                         | 0.953   | 0.953            | -0.001       | 0.821   | 0.842            |
| CTQ Emotional Neglect | LVS-RBA10            | 0.0097                          | 0.175   | 0.28             | -0.002       | 0.798   | 0.842            |
| CTQ Emotional Neglect | LVS-RBA11            | -0.0007                         | 0.823   | 0.941            | 0.003        | 0.373   | 0.596            |
| CTQ Emotional Neglect | RVS-LBA10            | 0.0203                          | 0.001   | 0.007            | 0.015        | 0.053   | 0.172            |
| CTQ Emotional Neglect | RVS-LBA11            | 0.0062                          | 0.175   | 0.28             | 0.01         | 0.065   | 0.172            |
| CTQ Emotional Neglect | RVS-RBA10            | 0.0175                          | 0.002   | 0.007            | 0.007        | 0.265   | 0.53             |
| CTQ Emotional Neglect | RVS-RBA11            | 0.0088                          | 0.031   | 0.083            | 0.015        | 0.001   | 0.01             |
| CTQ Physical Neglect  | LVS-LBA10            | 0.0195                          | 0.1     | 0.295            | 0.014        | 0.247   | 0.395            |
| CTQ Physical Neglect  | LVS-LBA11            | <0.0001                         | 0.997   | 0.997            | -0.002       | 0.745   | 0.745            |
| CTQ Physical Neglect  | LVS-RBA10            | 0.0165                          | 0.154   | 0.295            | 0.014        | 0.221   | 0.395            |
| CTQ Physical Neglect  | LVS-RBA11            | -0.0034                         | 0.507   | 0.579            | 0.002        | 0.671   | 0.745            |
| CTQ Physical Neglect  | RVS-LBA10            | 0.0243                          | 0.022   | 0.175            | 0.019        | 0.07    | 0.395            |
| CTQ Physical Neglect  | RVS-LBA11            | 0.0062                          | 0.406   | 0.541            | 0.007        | 0.345   | 0.46             |
| CTQ Physical Neglect  | RVS-RBA10            | 0.0128                          | 0.185   | 0.295            | 0.014        | 0.146   | 0.395            |
| CTQ Physical Neglect  | RVS-RBA11            | 0.0097                          | 0.154   | 0.295            | 0.009        | 0.207   | 0.395            |

### Further information on Clinical Measures

CTQ scores ranged from 25 to 125. Supplementary analyses examined specific effects of trauma subtypes, using five CTQ subscales ranging from 5 to 25 measuring a spectrum of abuse (emotional, physical and sexual) and neglect (emotional and physical). Higher CTQ and CTQ subscale scores reflect worse trauma severity. The Montgomery-Asberg Depression Rating Scale (MADRS) is a clinician rated measure of depressive symptoms and was used in sensitivity analyses(1). The MADRS was administered by a trained clinician. MADRS scores range between 0 and 60, with higher scores indicating worse depression severity. The Patient-Reported Outcomes Measurement Information System Anxiety Item bank consisting of 29 items is a well-validated computerized adaptive self-report measure (PROMIS Anxiety) broadly measuring anxiety severity (administering typically 4 to 8 questions which may be variable between participants) and allows determination of T-scores with mean of 50 and standard deviation of 10, with higher scores indicating worse anxiety severity(2).

### Supplemental References

1. Montgomery SA, Asberg M (1979): A new depression scale designed to be sensitive to change. *The British journal of psychiatry : the journal of mental science.* 134:382-389.
2. Pilkonis PA, Choi SW, Reise SP, Stover AM, Riley WT, Cella D, et al. (2011): Item banks for measuring emotional distress from the Patient-Reported Outcomes Measurement Information System (PROMIS®): depression, anxiety, and anger. *Assessment.* 18:263-283.
